# Supplementary material
Source: publisher figshare collection journal article supplement (https://karger.figshare.com/articles/dataset/_/5128402)
Supplement: Supplementary file 1 [file 1]

- 1 Appendix Table 2. Beta coefficients for weight-for-age z-scores (WAZ; N=628), length-for-age/height-for-age z-scores (LAZ/HAZ;
- 2 N=628), and body mass index z-score (BMIZ; N=628) by gestational weight gain (GWG).

|                                      | WAZ                        | LAZ/HAZ                    | BMIZ                       |
|--------------------------------------|----------------------------|----------------------------|----------------------------|
|                                      | Adjusted* beta coefficient | Adjusted* beta coefficient | Adjusted* beta coefficient |
|                                      | (95% CI)                   | (95% CI)                   | (95% CI)                   |
| Intercept                            | -0.31 (-0.52, -0.11)       | -0.08 (-0.30, 0.15)        | -0.40 (-0.60, -0.19)       |
| Child's age (months)                 | 0.05 (0.04, 0.07)          | -0.01 (-0.02, 0.01)        | 0.08 (0.06, 0.09)          |
| Inadequate GWG vs. adequate GWG      | -0.38 (-0.60, -0.16)       | -0.21 (-0.46, 0.04)        | -0.44 (-0.69, -0.20)       |
| Inadequate GWG * child's age         | 0.02 (-0.001, 0.04)        | 0.003 (-0.02, 0.03)        | 0.03 (0.01, 0.06)          |
| Inadequate GWG * child's age squared | -0.0003 (-0.001, 0.0002)   | 0.0001 (-0.001, 0.001)     | -0.001 (-0.001, 0.00001)   |
| Excessive GWG vs. adequate GWG       | 0.30 (0.12, 0.49)          | 0.21 (-0.01, 0.42)         | 0.25 (0.04, 0.45)          |
| Excessive GWG * child's age          | -0.02 (-0.03, -0.001)      | -0.01 (-0.03, 0.01)        | -0.02 (-0.04, 0.004)       |
| Excessive GWG * child's age squared  | 0.001 (0.0001, 0.001)      | 0.0003 (-0.0002, 0.001)    | 0.001 (-0.0001, 0.001)     |

- 3 \* Multivariable linear model adjusted for prepregnancy body mass index, child's age squared, inadequate x child's age squared,  
4 excessive x child's age squared, maternal education, pattern of prenatal alcohol, marijuana, cigarette smoking, ever breastfed infant,  
5 and solid foods introduced  $\geq 6$  months.
