# Supplementary material
Source: publisher figshare collection journal article supplement (https://karger.figshare.com/articles/dataset/_/5128402)
Supplement: Supplementary file 2 [file 1]

1 Appendix Table 1. Characteristics by rapid infant weight gain from 0 to 18 months.

|                                                      | Rapid infant weight gain<br>from 0 to 18 months<br>(N=609) |       |
|------------------------------------------------------|------------------------------------------------------------|-------|
|                                                      | Not Rapid                                                  | Rapid |
| Prepregnancy body mass index (kg/m <sup>2</sup> ), % |                                                            |       |
| Underweight (<18.5)                                  | 54                                                         | 46    |
| Normal weight (18.5-24.9)                            | 55                                                         | 45    |
| Overweight (25.9-29.9)                               | 55                                                         | 45    |
| Obese (≥30.0)                                        | 60                                                         | 40    |
| Maternal race/ethnicity, %                           |                                                            |       |
| White                                                | 59                                                         | 41    |
| Black                                                | 52                                                         | 48    |
| Income level (\$/month), %                           |                                                            |       |
| <400                                                 | 55                                                         | 45    |
| ≥400                                                 | 57                                                         | 43    |
| Parity                                               |                                                            |       |
| Nulliparous                                          | 54                                                         | 46    |
| Multiparous                                          | 57                                                         | 43    |
| Pattern of prenatal smoking, % *                     |                                                            |       |
| Never used in pregnancy                              | 64                                                         | 36    |
| First trimester use only                             | 51                                                         | 49    |
| Second and/or third trimester use                    | 49                                                         | 51    |

|                                                                       |    |    |
|-----------------------------------------------------------------------|----|----|
| Pattern of prenatal alcohol use, %                                    |    |    |
| Never used in pregnancy                                               | 52 | 48 |
| First trimester use only                                              | 54 | 46 |
| Second and/or third trimester use                                     | 61 | 39 |
| Pattern of prenatal marijuana use, %                                  |    |    |
| Never used in pregnancy                                               | 58 | 42 |
| First trimester use only                                              | 56 | 44 |
| Second and/or third trimester use                                     | 47 | 53 |
| Gestational age at delivery (weeks), (%) *                            |    |    |
| <37 weeks                                                             | 4  | 96 |
| ≥37 weeks                                                             | 60 | 40 |
| Birth weight for gestational age z-score, % *                         |    |    |
| Small for age (<10 <sup>th</sup> percentile)                          | 25 | 75 |
| Appropriate for age (10 <sup>th</sup> to 90 <sup>th</sup> percentile) | 60 | 40 |
| Large for age (>90 <sup>th</sup> percentile)                          | 91 | 9  |
| Infant sex, %                                                         |    |    |
| Female                                                                | 55 | 45 |
| Male                                                                  | 56 | 44 |
| Ever breastfed infant, %                                              |    |    |
| Yes                                                                   | 63 | 37 |
| No                                                                    | 54 | 47 |

---

\* Pearson chi-square test  $p < 0.05$

2

3
